# Supplementary material for: IL-27 induces the expression of IDO and PD-L1 in human cancer cells
Source: PubMed Central journal article supplement (PMC4791231; doi:10.18632/oncotarget.6530), 2015-12-09
Supplement: oncotarget-06-43267-s001.pdf [file oncotarget-06-43267-s001.pdf]

## IL-27 induces the expression of IDO and PD-L1 in human cancer cells

### Supplementary Material

**Supplementary Table 1. Characteristics of the EOC cell lines used.**

| <b>Name</b> | <b>Histotype</b>    | <b>TP53</b> | <b>Other mutations</b>             |
|-------------|---------------------|-------------|------------------------------------|
| CaOv3       | high-grade serous   | mutated     |                                    |
| OVCAR5      | high-grade serous   | null        | KRAS                               |
| SKOV3       | atypical non-serous | wt*/null    | ERB2 amplification, PIK3CA, ARID1A |
| A2774       | endometrioid        | mutated     |                                    |
| A2780       | mucinous            | wt          | PIK3CA, PTEN, BRAF, ARID1A         |
| OC316       | mucinous            | wt          | BRCA2, PIK3CA, BRAF, ARID1A        |

\*discrepancies in the literature are reported. Histotypes are referred to recent molecular classifications, when applicable [49,50].

**Supplementary Table 2. QRT-PCR primers.**

| <b>Gene</b>        | <b>Forward primer</b>   | <b>Reverse primer</b>  |
|--------------------|-------------------------|------------------------|
| <i>IDO1</i>        | GCCTGATCTCATAGAGTCTGGC  | TGCATCCCAGAACTAGACGTGC |
| <i>PDL1(CD274)</i> | TGCCGACTACAAGCGAATTACTG | CTGCTTGTCAGATGACTTCGG  |
| <i>GAPDH</i>       | GAAGGTGAAGGTCGGAGT      | CATGGGTGGAATCATATTGGAA |
| <i>POLR2A</i>      | GACAATGCAGAGAAGCTGG     | GCAGGAAGACATCATCATCC   |

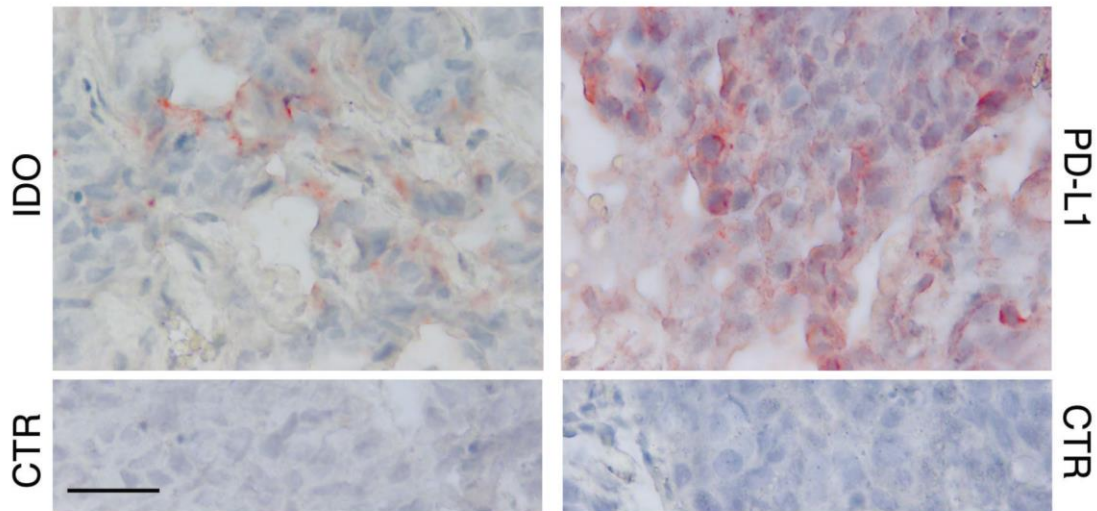

### Supplementary Figure 1

#### Expression of IDO and PD-L1 in xenografts of the A2774 EOC cell line.

The experiments were performed according to the National Regulation on Animal Research Resources and approved by the Institutional Review Board. Six-weeks old NOD/SCID animals (bred in house) were injected i.p. with  $5 \times 10^6$  A2774 cells. Tumour masses were excised and fixed in 10% buffered formalin and processed for IHC as described in the Materials and Methods. Negative control (CTR) of a contiguous section is shown. Scale bar: 100  $\mu\text{m}$ .

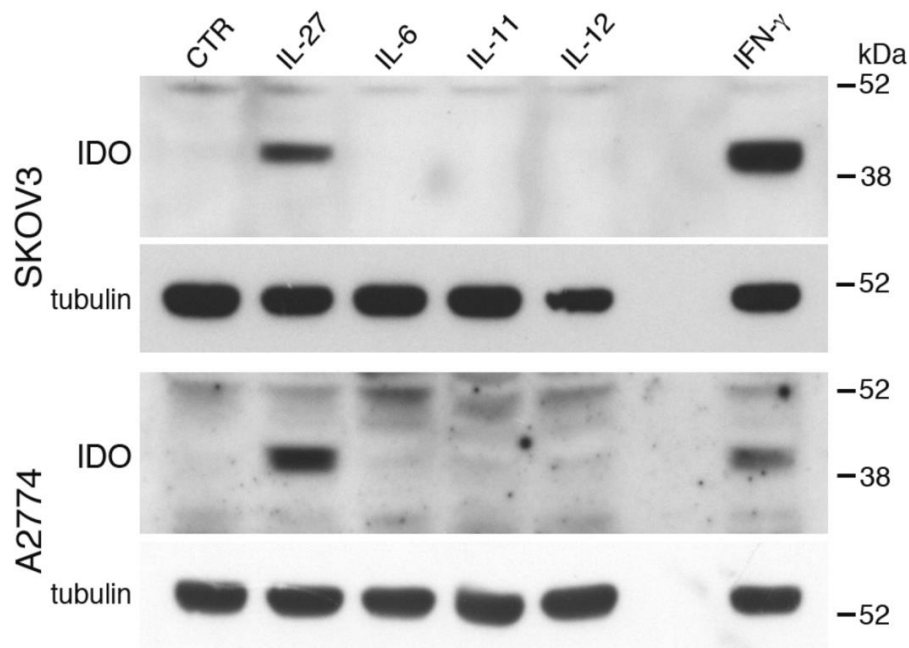

**Supplementary Figure 2**  
**IL-27 induces IDO protein expression in human EOC cells *in vitro*, while IL-6, IL-11 and IL-12 are inactive.**

Western blot analysis of IDO expression in SKOV3 and A2774 EOC cell lines stimulated with the indicated cytokines (100 ng/ml) or medium only (CTR) for 48 h.  $\alpha$ -tubulin is used as loading control.

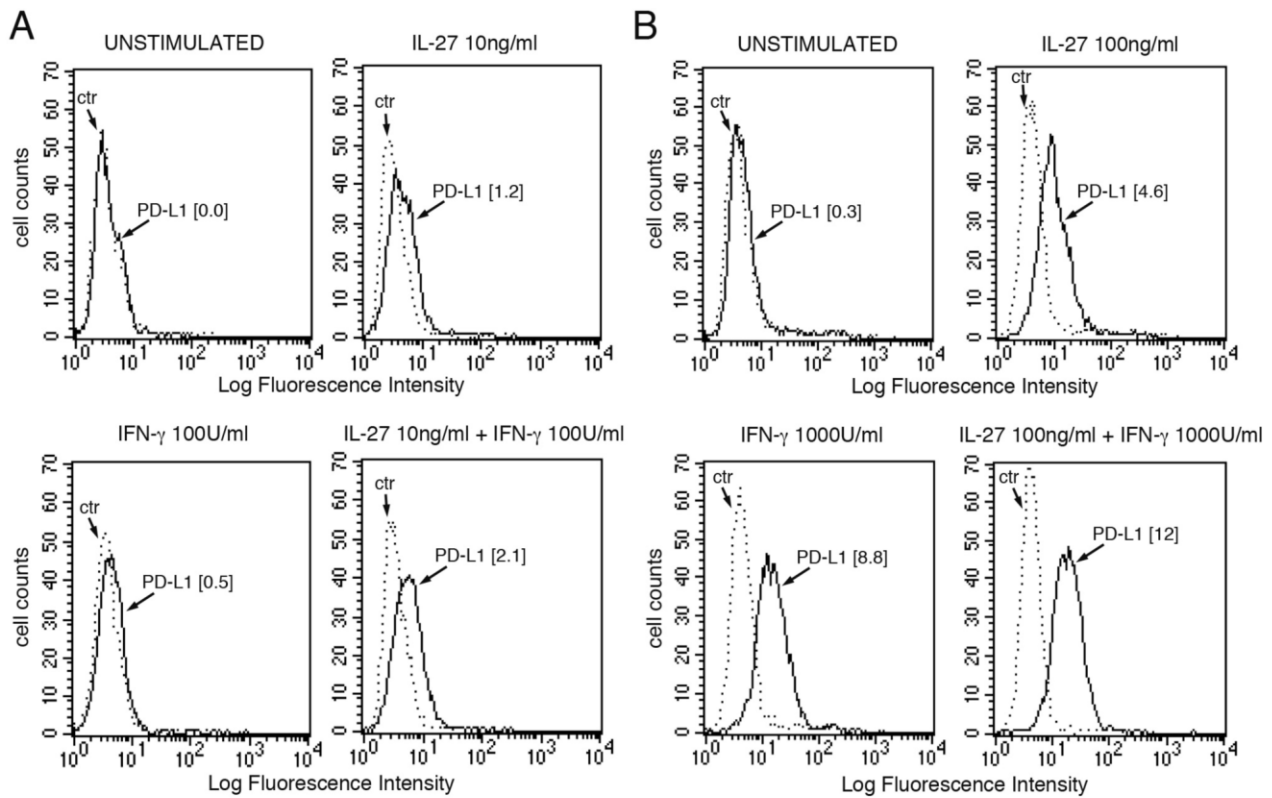

**Supplementary Figure 3**

**IL-27 and IFN- $\gamma$  cooperatively increase surface PD-L1 expression in EOC cells *in vitro*.**

FACS analysis of surface PD-L1 expression in the SKOV3 EOC cell line, cultured in the presence of medium, IL-27 and/or IFN- $\gamma$  (**A**: 10 ng/ml and 100 U/ml; **B**: 100 ng/ml and 1000 U/ml, respectively). Combination of the two cytokines showed additive effects. Dotted lines are isotype-matched unrelated Ig staining controls. Numbers in brackets are MFI values calculated as median PD-L1 minus median Ig control. A representative experiment out of three with similar results is shown.

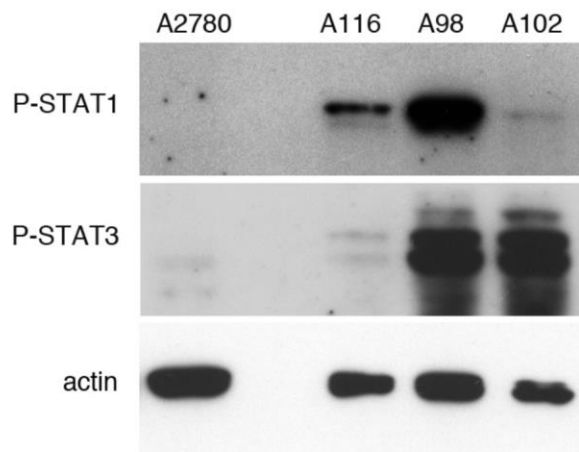

#### **Supplementary Figure S4**

**STAT1 and STAT3 are constitutively phosphorylated in cells isolated from ascites but not in a representative cell line.**

Western blot analysis of P-STAT1 and P-STAT3 proteins in neoplastic cells isolated from the ascites of ovarian cancer patients and in a negative EOC cell line (un-stimulated A2780), provided as control.  $\beta$ -actin was used as loading control. Constitutive STAT1 and STAT3 activation is observed in patient samples.

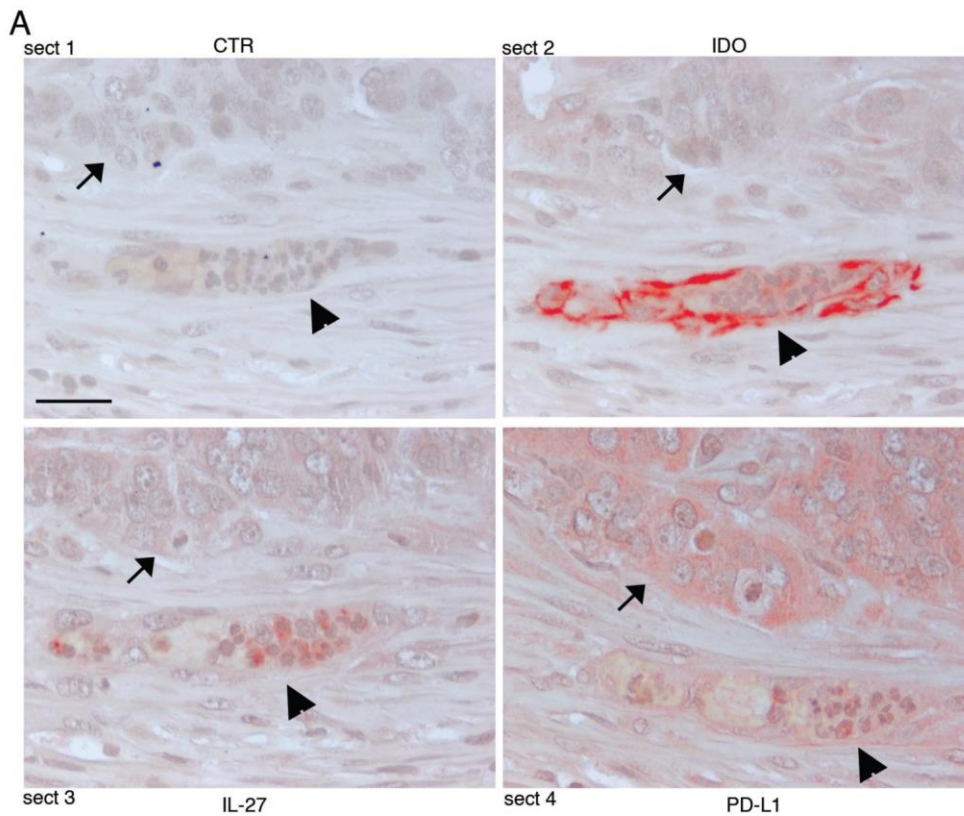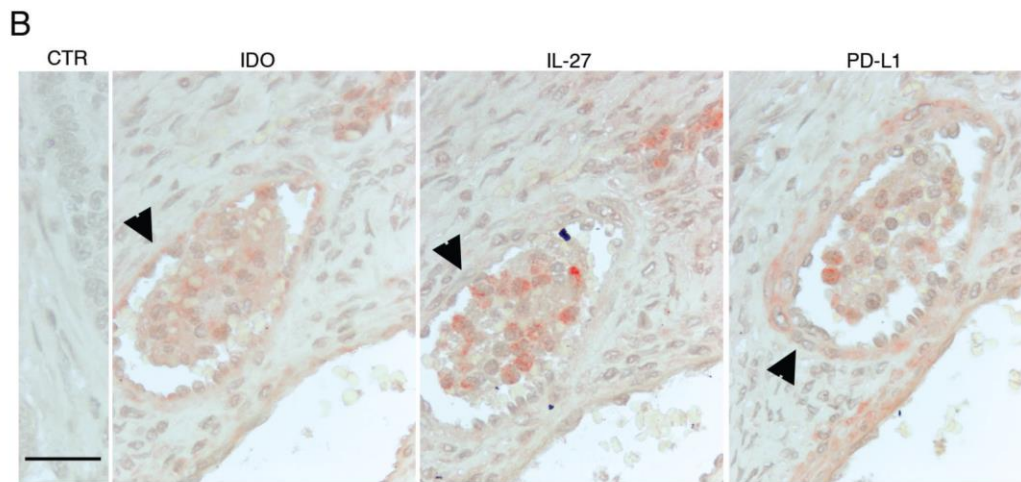

### Supplementary Figure 5

#### Expression of IL-27, IDO and PD-L1 in human ovarian cancer specimen.

Immunohistochemical analysis of IL-27, IDO and PD-L1 expression in sequential sections of human ovarian cancer FFPE specimen. IL-27 is expressed by leukocytes within some tumor microvessels (arrowhead), and PD-L1 and IDO are expressed in neighbouring cells. Negative control (CTR) of a contiguous section is shown. Arrow indicates tumor cells. Scale bar: 100  $\mu$ m.

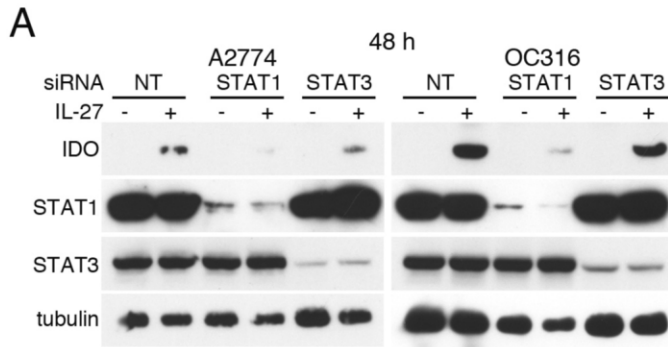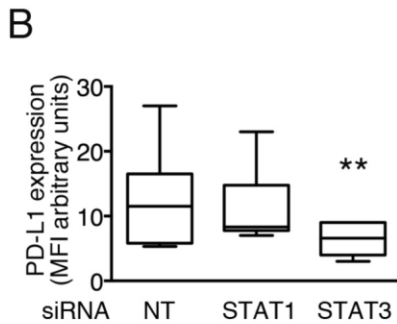

### Supplementary Figure 6

#### Silencing of STAT1 or STAT3 with siRNA effects IL-27-driven IDO or PD-L1 expression (Replicate experiments).

**A:** Western blot analysis of IDO, STAT1 and STAT3 expression in STAT1- or STAT3-silenced or scrambled siRNA-transfected A2774 and OC316 EOC cells untreated or treated for 48 h with IL-27 (50 ng/ml).  $\alpha$ -tubulin is shown as loading control. **B:** FACS analysis of PD-L1 surface expression in STAT1 or STAT3-silenced or scrambled siRNA-transfected (NT) OC316 and A2774 EOC cells untreated or treated for 48 h with IL-27 (100 ng/ml). Mean MFI values of six different experiments are shown as box-and-whiskers plot with minimum and maximum. MFI values were calculated as median PD-L1 minus median Ig control. Significant inhibition of IL-27-induced surface PD-L1 was observed only in STAT3-silenced cells (\*\*  $P=0.03$  by Wilcoxon matched-pairs signed rank test).
